# Supplementary material for: Tryptophan Metabolism Acts as a New Anti‐Ferroptotic Pathway to Mediate Tumor Growth
Source: PubMed Central journal article supplement (PMC9951368; doi:10.1002/advs.202204006), 2023-01-10

## Supporting Information

for *Adv. Sci.*, DOI 10.1002/adv.202204006

Tryptophan Metabolism Acts as a New Anti-Ferroptotic Pathway to Mediate Tumor Growth

*Dong Liu, Chun-hui Liang, Bin Huang, Xiao Zhuang, Weiwei Cui, Li Yang, Yinghong Yang, Yudan Zhang, Xiaolong Fu, Xiaojun Zhang, Lutao Du, Wei Gu, Xiangdong Wang, Chengqian Yin\*, Renjie Chai\* and Bo Chu\**

## Supplementary Figure legends:

### **Figure S1. Tryptophan metabolites inhibits ferroptosis.**

**A-E**, Lipid peroxidation of HT1080 cells treated with RSL3 and tryptophan metabolites.

### **Figure S2. 5-HT and 3-HA inhibits RSL3-induced lipid peroxidation.**

**A-B**, Immunofluorescence staining of BODIPY 581/591 C11 to detect the level of lipid peroxidation in the cells treated with 5-HT (10 $\mu$ M) (A) or 3-HA (10 $\mu$ M) (B).

### **Figure S3. Tyrosine metabolism pathway has no obvious effect to inhibit ferroptosis.**

**A**, Electron microscopy analysis showed the change of mitochondrial morphology in HT1080 cells treated with RSL3, 5-HT and 3-HA.

**B**, Schematic diagram of tyrosine metabolism pathway.

**C**, Dose-dependent toxicity of RSL3 induced cell death in HT1080 cells upon tyrosine metabolites treatment. Tyrosine, 50 $\mu$ M; 4-HPPA, 50 $\mu$ M; 4-HBz, 50 $\mu$ M; 4-HB, 50 $\mu$ M; 4-HPLA, 50 $\mu$ M.

### **Figure S4. 5-HT is a potent ferroptosis suppressor.**

**A**, Dose-dependent toxicity of RSL3 induced cell death in HT1080 cells upon 5-HT or melatonin treatment for the indicated concentration.

**B**, Western blot of NRF2 and NRF2 target genes in HT1080 cells supplemented with 5-HT (20 $\mu$ M) treatment.

**C**, Cell death measurement of HT1080 WT and NRF2 KO cells upon 5-HT (10 $\mu$ M) treatment for 8h.

**D**, Dose-dependent toxicity of RSL3 induced cell death in HT1080 and 786-O cells upon 5-HTP treatment for the indicated concentration.

**E**, Dose-dependent toxicity of RSL3 induced cell death in HT1080 and 786-O cells upon 5-HIAA treatment for the indicated concentration.

**F**, Cell death of HT1080 cells treated with tryptophan (10 $\mu$ M), 5-HT (10 $\mu$ M), 5-HTP (10 $\mu$ M), 5-HAA (10 $\mu$ M) and RSL3 for the indicated concentration.

### **Figure S5. 5-HT mediated ferroptosis resistance is independent of 5-HT receptor signaling or classical anti-ferroptosis pathway.**

**A-B**, Cell death measurement of 293T arrestin  $\beta$ 1 $^{-/-}$  (A) cells and arrestin  $\beta$ 2 $^{-/-}$  (B) cells treated with RSL3 (2.5 $\mu$ M) and Fer-1 (1 $\mu$ M) for 8h.

**C**, Dose-dependent toxicity of RSL3 induced cell death in HT1080 cells upon NF449 (1 $\mu$ M), PTX (100ng/ml) and 5-HT (10 $\mu$ M) treatment.

**D**, Western blot analysis of ferroptosis-related genes in HT1080 cells upon 5-HT (20 $\mu$ M) treatment.

**E**, Cell death measurement of HT1080 FSP1 $^{-/-}$  cells treated with RSL3 (200nM), 5-HT (10 $\mu$ M) and Fer-1 (1 $\mu$ M) for 8h.

**F**, Cell death measurement of HT1080 GCH1 $^{-/-}$  cells treated with RSL3 (200nM), 5-HT (10 $\mu$ M) and Fer-1 (1 $\mu$ M) for 8h.

**G**, Cell death measurement of HT1080 cells expressing DHODH sgRNA treated with RSL3 (200nM), 5-HT (10 $\mu$ M) and Fer-1 (1 $\mu$ M) for 8h.

**H**, Cell death measurement of HT1080 SLC7A11 $^{-/-}$  cells treated with RSL3 (200nM), 5-HT (10 $\mu$ M) and Fer-1 (1 $\mu$ M) for 8h.

### **Figure S6. MAOA is a potential tumour suppressor.**

**A**, TIMER database analysis revealed that MAOA is down-regulated in multiple cancer samples.

**B**, Kaplan–Meier survival curves for patients with indicated tumour types containing low or high expression of MAOA mRNA in the TCGA dataset. The P value was calculated using the log-rank Mantel–Cox test.

**C**, Representative immunohistochemical staining (IHC) of kidney renal clear cell carcinoma samples.

**Figure S7. 3-HA remarkably decreases ferroptotic cell death in a panel of cancer cell lines.**

**A**, Dose-dependent toxicity of RSL3 induced cell death in B16F10 cells upon 3-HA treatment for the indicated concentration.

**B**, Dose-dependent toxicity of RSL3 or erastin induced cell death in HT1080 cells upon L-KYN, 3-HK and 3-HA treatment for the indicated concentration.

**C-D**, Dose-dependent toxicity of RSL3 induced cell death in 786-O (C) and OVCAR8 (D) cells upon L-KYN, 3-HK and 3-HA treatment for the indicated concentration.

**Figure S8. 3-HA mediated ferroptosis inhibition is independent of NRF2 pathway.**

**A**, Western blot analysis of NRF2 and SLC7A11 in HT1080 cells upon tryptophan, L-KYN, 3-HK and 3-HA treatment for the indicated concentration.

**B**, Dose-dependent toxicity of RSL3 induced cell death in HT1080 cells upon tryptophan treatment for the indicated concentration.

**C-D**, Cell death measurement of HT1080 NRF2<sup>-/-</sup> (C) and SLC7A11<sup>-/-</sup> (D) cells treated with RSL3 (200nM), 5-HT (10 $\mu$ M) and Fer-1 (1 $\mu$ M) for 8h.

**E**, Western blot analysis of KYNU in CFPAC1 KYNU<sup>-/-</sup> clones.

**F**, Cell viability of CFPAC1 WT and KYNU<sup>-/-</sup> cells treated with RSL3 for the indicated concentration.

**G**, Western blot analysis of KYNU in WT and KYNU-overexpressing B16F10.

**H-I**. Tumour volumes (H) and weight (I) of WT and KYNU-overexpressing B16F10 xenograft in C57BL/6 mice (n=6).

**J**, Western blot analysis of HAAO in CFPAC1 cells expressing HAAO sgRNA.

**K**, Cell death measurement of CFPAC1 cells expressing HAAO sgRNA treated with RSL3 for 8h.

**Figure S9. HAAO is a potential tumour suppressor.**

**A**, TIMER database analysis revealed that HAAO is down-regulated in multiple cancer samples.

**B**, Kaplan–Meier survival curves for patients with indicated tumour types containing low or high expression of HAAO mRNA in the TCGA dataset. The P value was calculated using the log-rank Mantel–Cox test.

**C**, The correlation of HAAO with ferroptosis-relative genes.

**Figure S1**

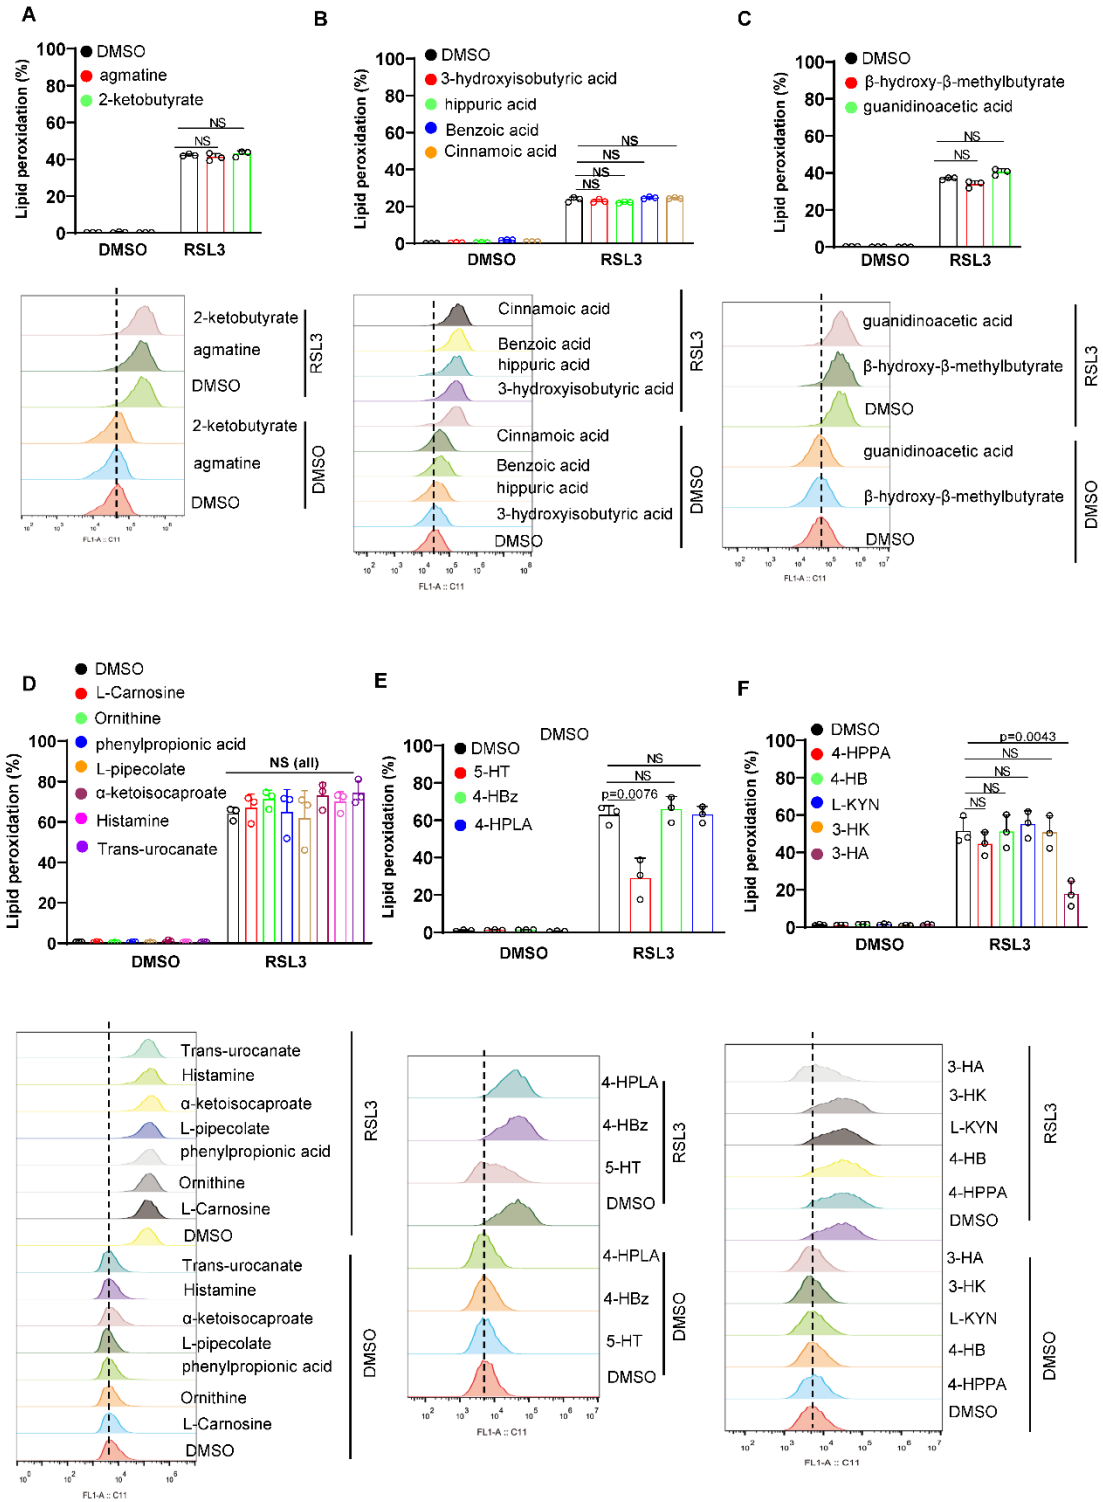

Figure S2

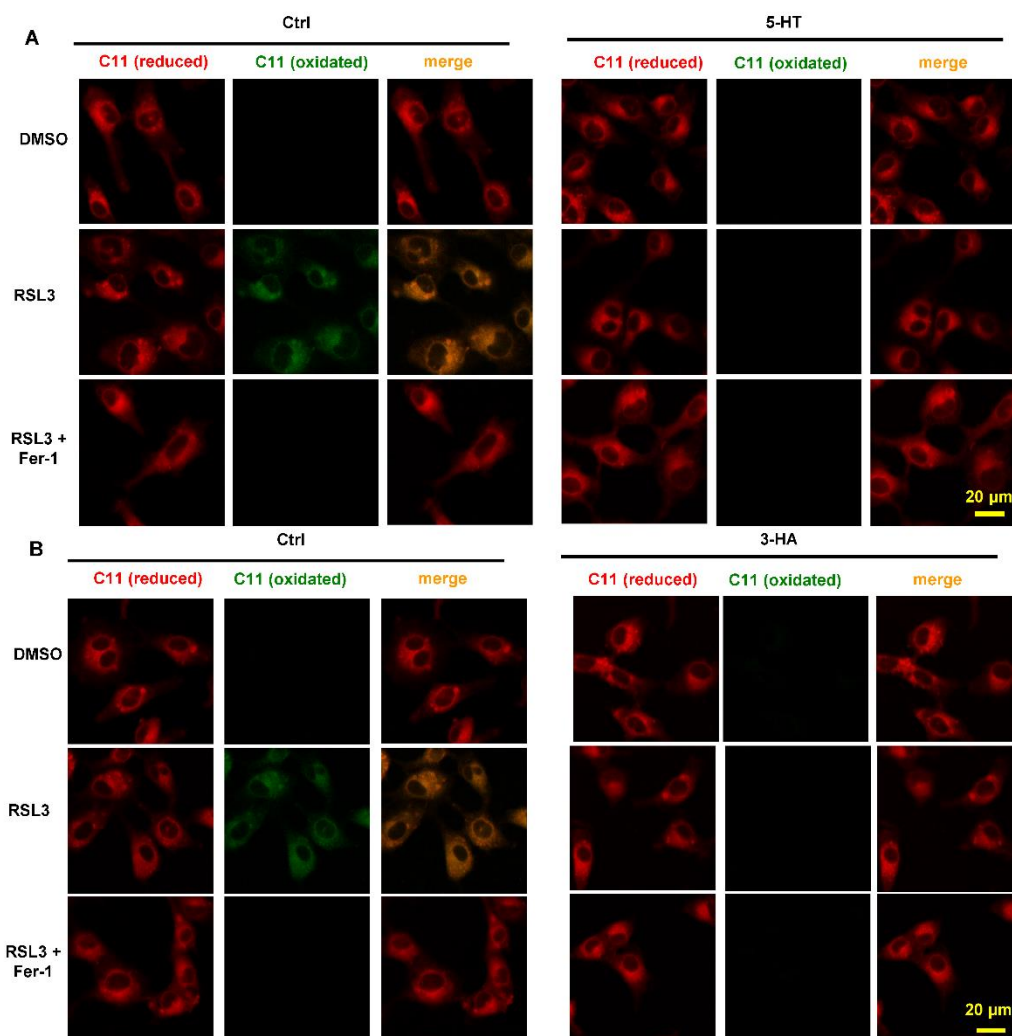

Figure S3

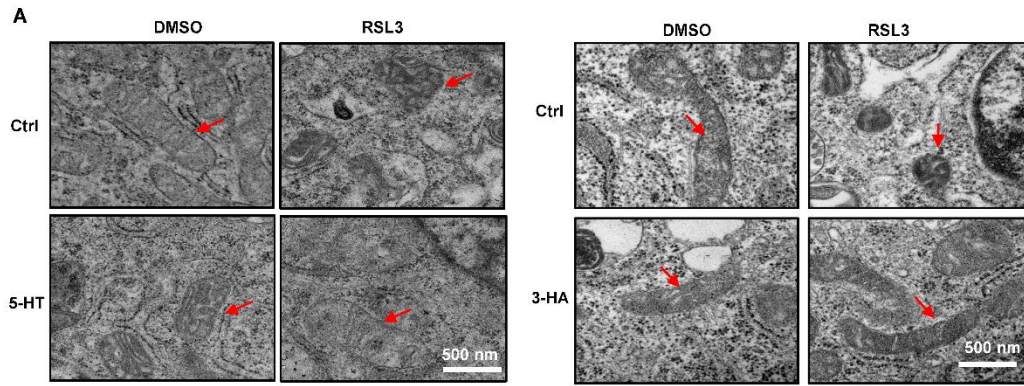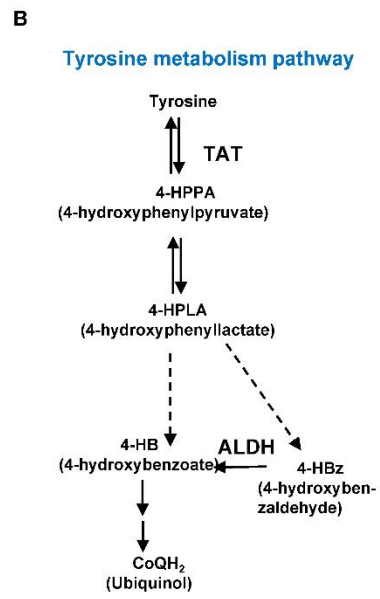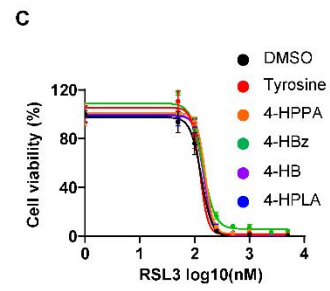

Figure S4

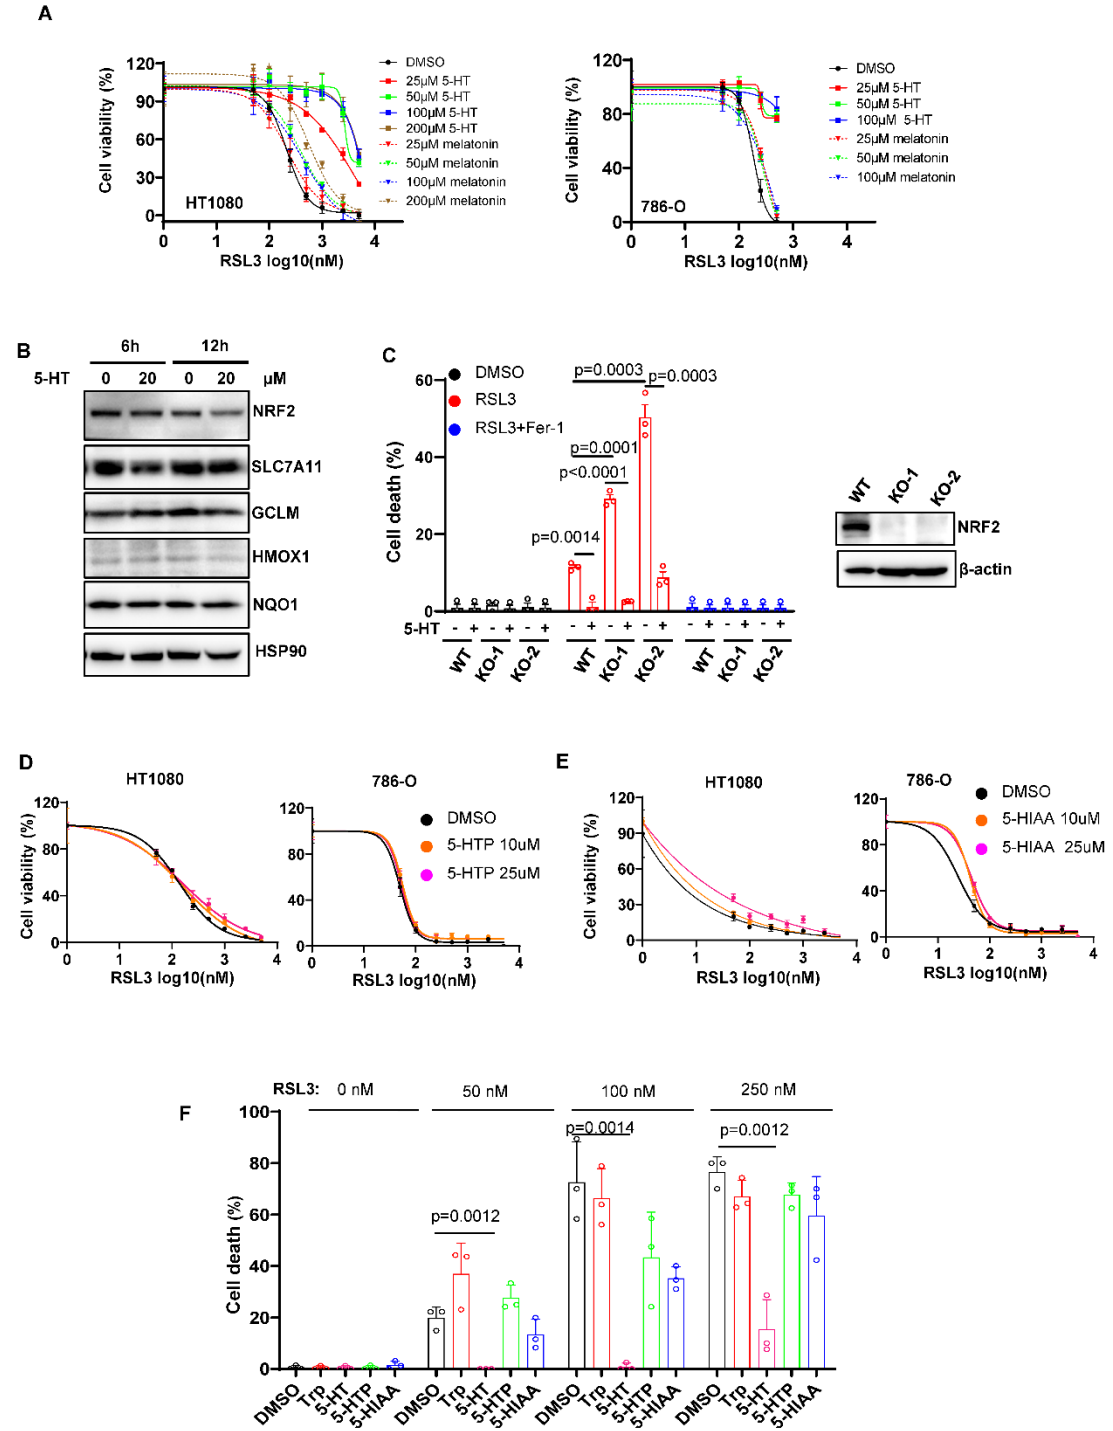

**Figure S5**

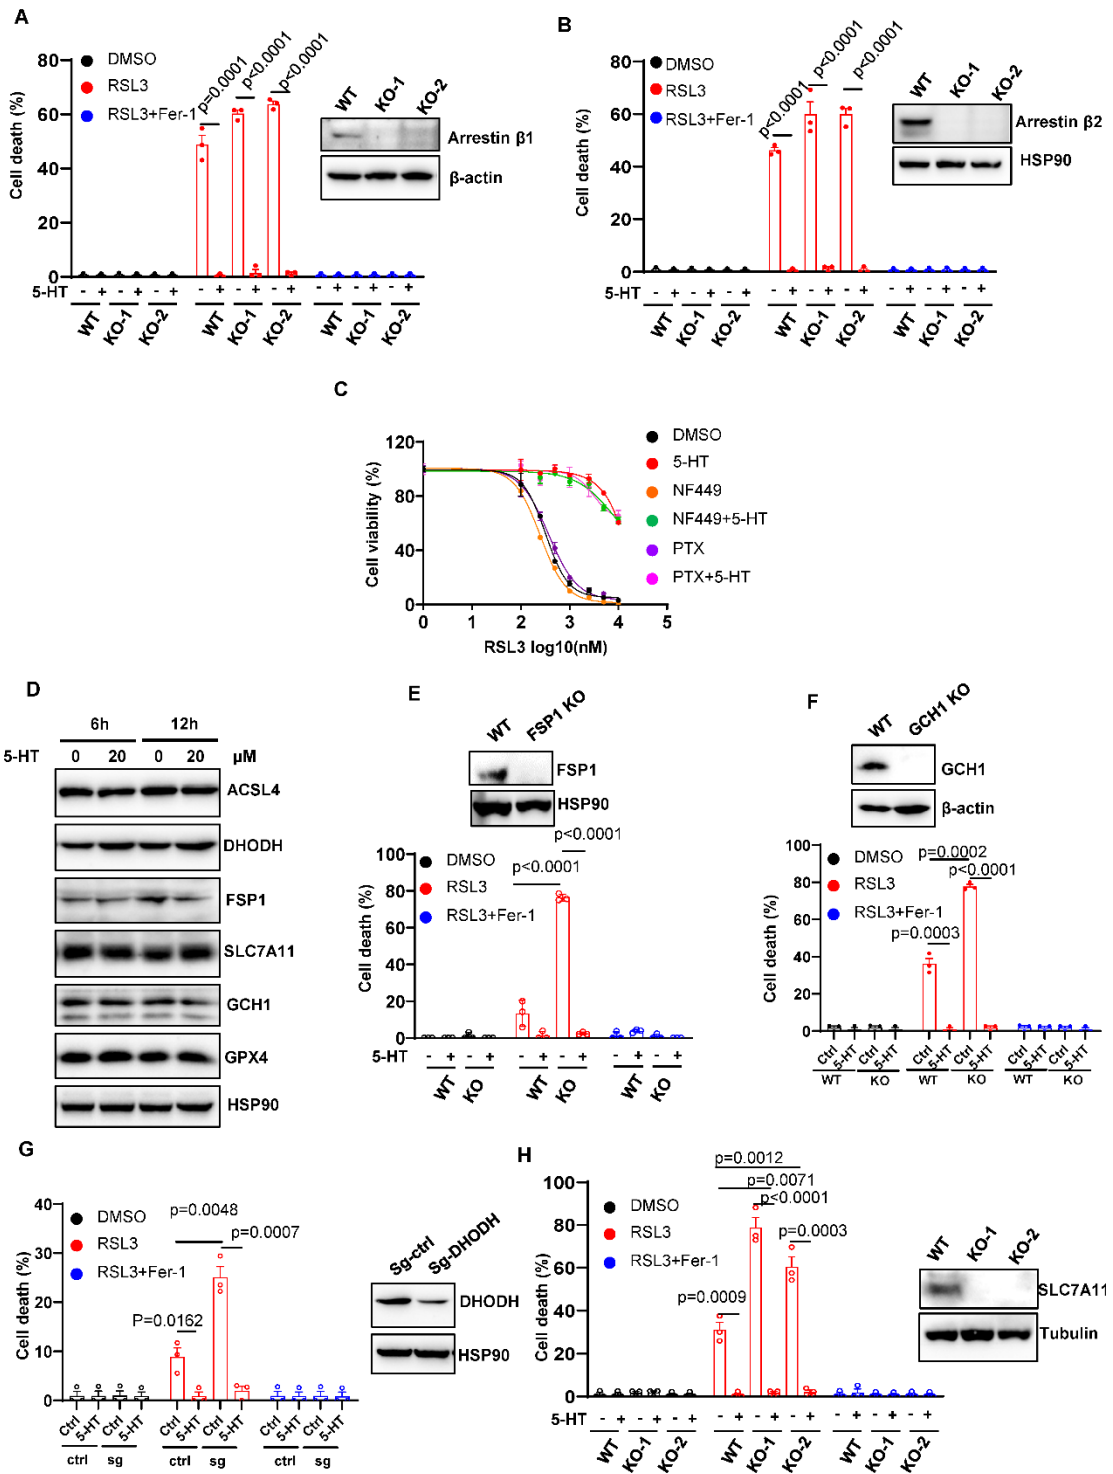



**Figure S6**

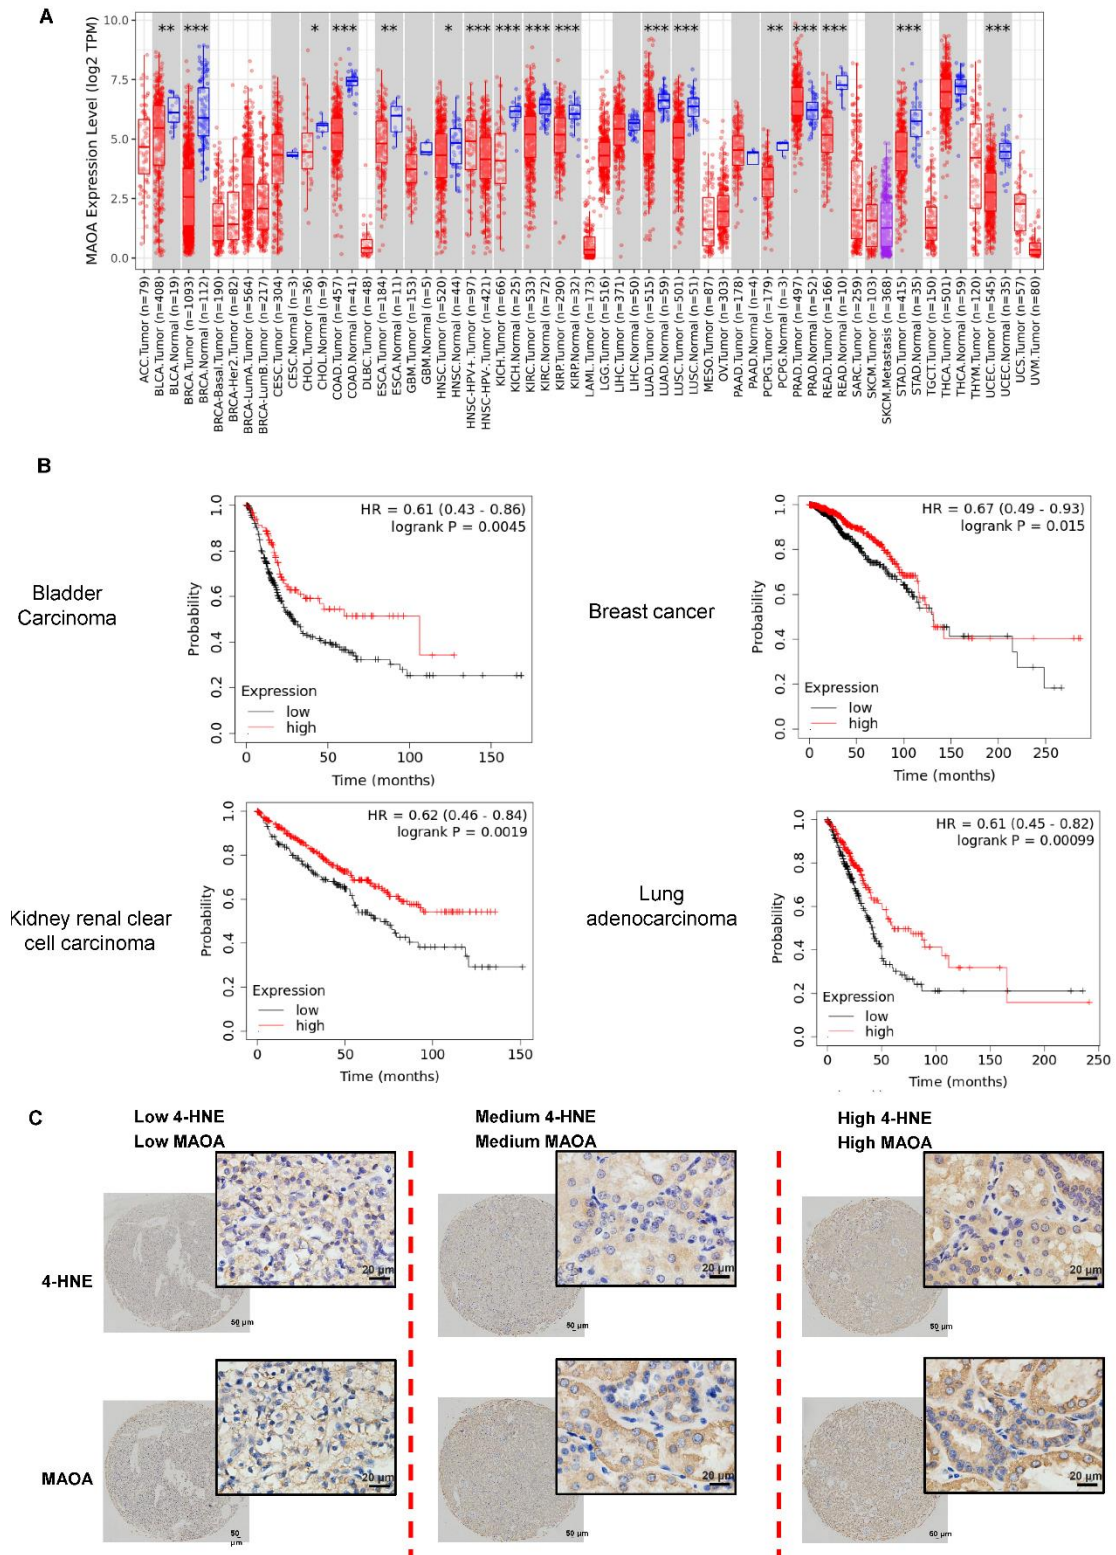

Figure S7

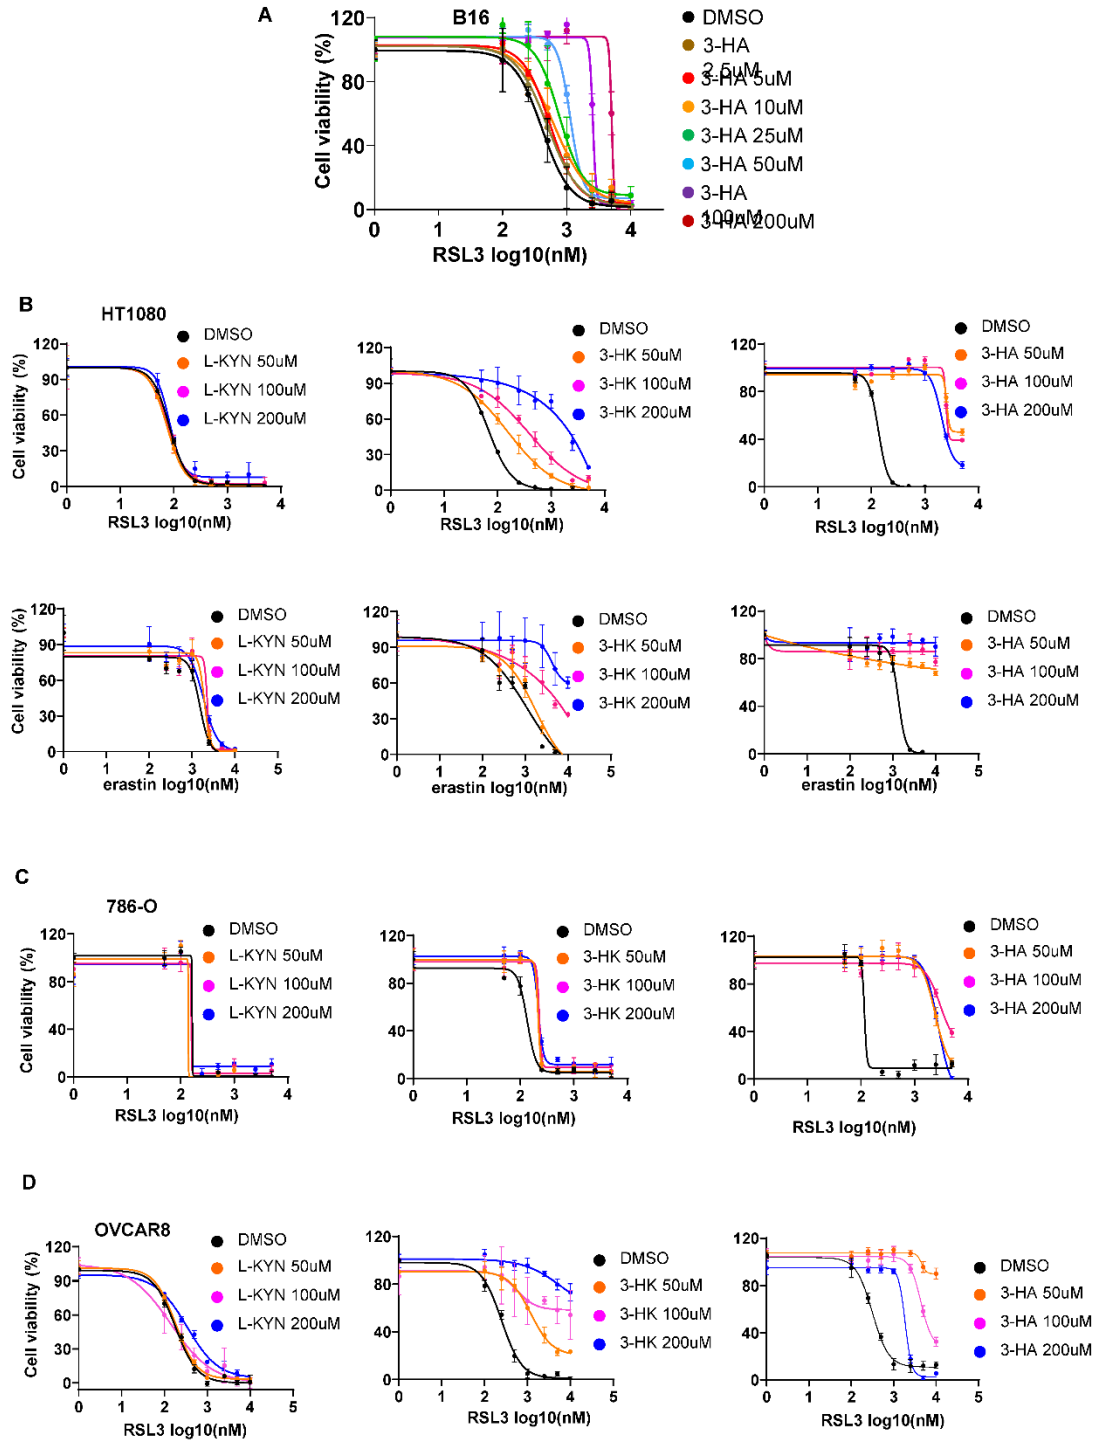



Figure S9

A

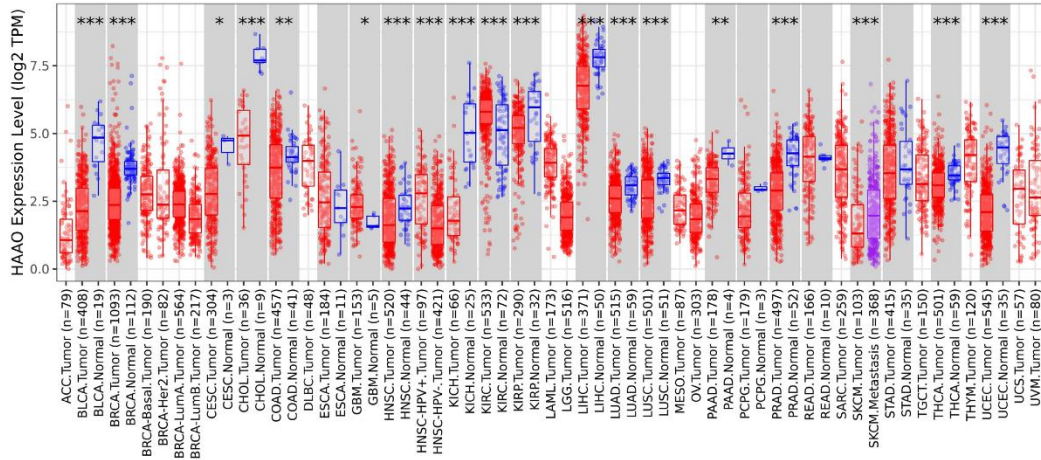

B

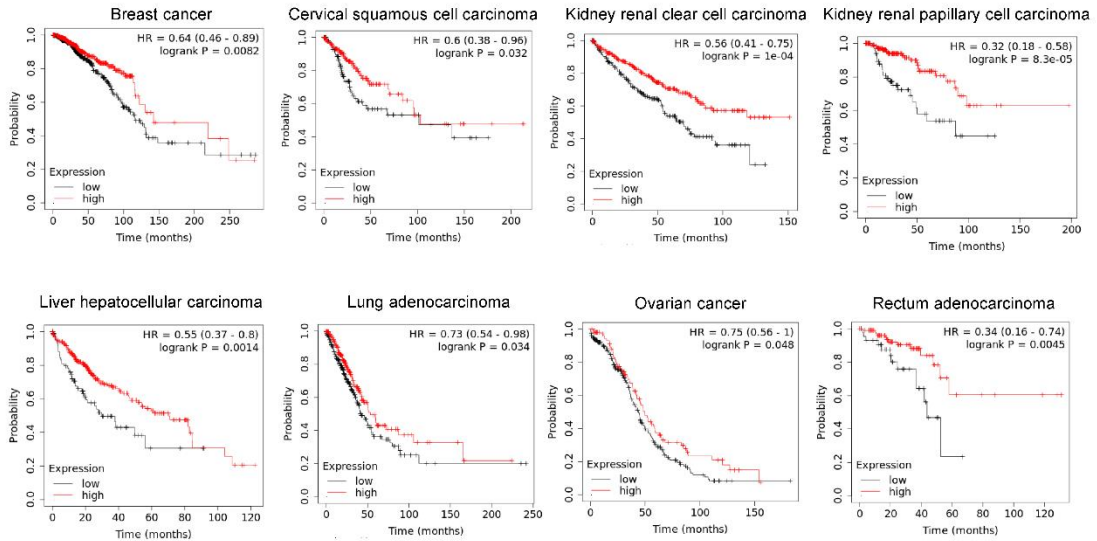

C

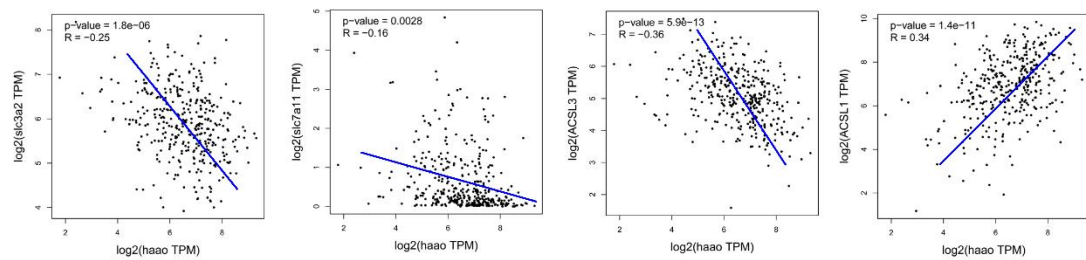

Supplement: ADVS-10-2204006-s001.pdf [file ADVS-10-2204006-s001.pdf]
